# Supplementary material
Source: PubMed Central journal article supplement (PMC4267894)
Supplement: NIHMS640515-supplement-2.pdf [file NIHMS640515-supplement-2.pdf]

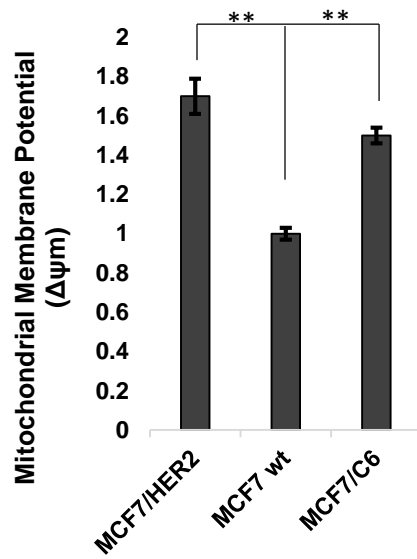

**Supplemental Figure 1.** Mitochondrial membrane potential of MCF7 wt, C6 and HER2 overexpressing cells, measured by JC-1 staining (n=3, \*\*p<0.01).
