# Supplementary material
Source: PubMed Central journal article supplement (PMC4267894)
Supplement: NIHMS640515-supplement-3.pdf [file NIHMS640515-supplement-3.pdf]

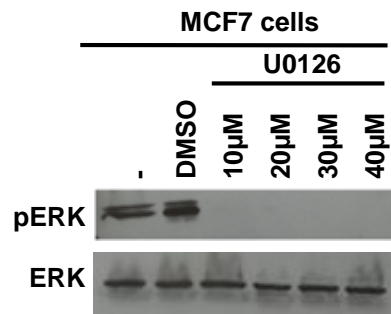

**Supplemental Figure 2. The inhibition of ERK phosphorylation by U0126.** The treatment of MCF7s with increasing concentrations of MEK inhibitor, U0126. DMSO is used as the solvent control.
