# Supplementary material
Source: PubMed Central journal article supplement (PMC4267894)
Supplement: NIHMS640515-supplement-4.pdf [file NIHMS640515-supplement-4.pdf]

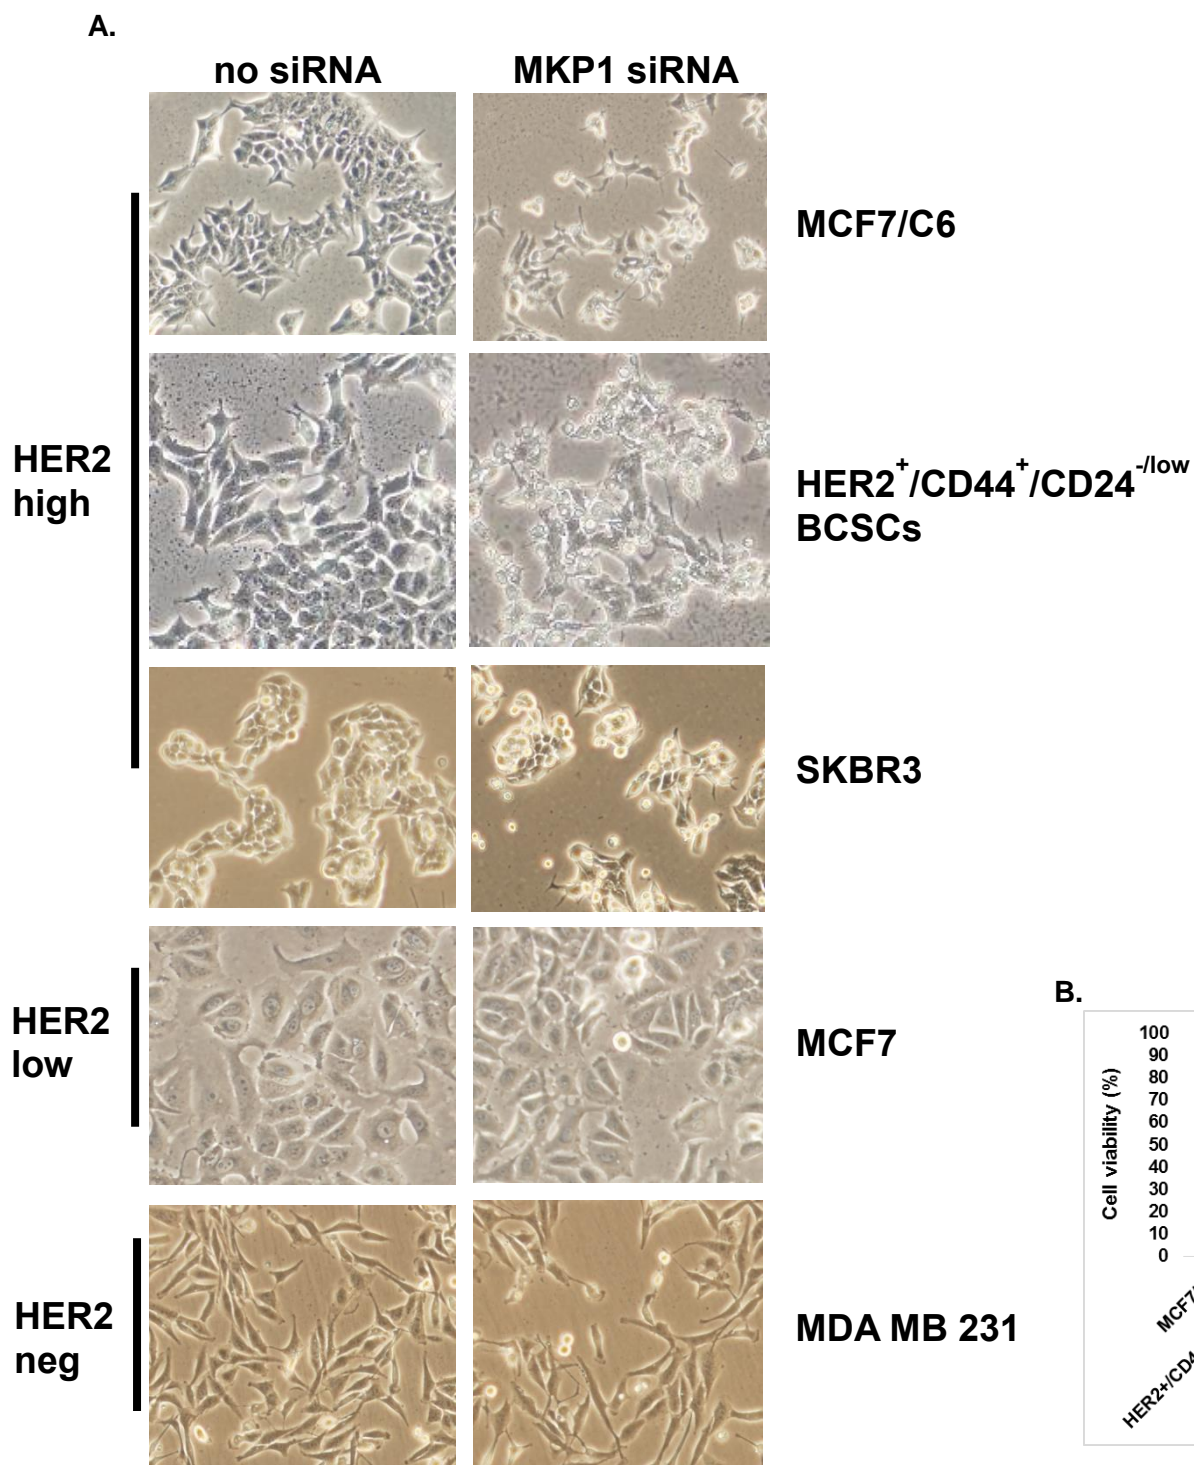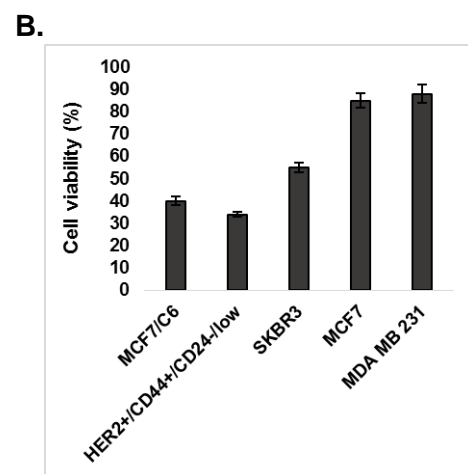

**Supplemental Figure 3. Cell viability following MKP1 siRNA treatment.** A panel of breast cancer cells with different HER2 status were transfected with MKP1 siRNA. **(a)** Bright field images were obtained to visualize the morphology and viability of cells. **(b)** The percentage of viable cells following MKP1 siRNA treatment.
