# Supplementary material
Source: PubMed Central journal article supplement (PMC4267894)
Supplement: NIHMS640515-supplement-6.pdf [file NIHMS640515-supplement-6.pdf]

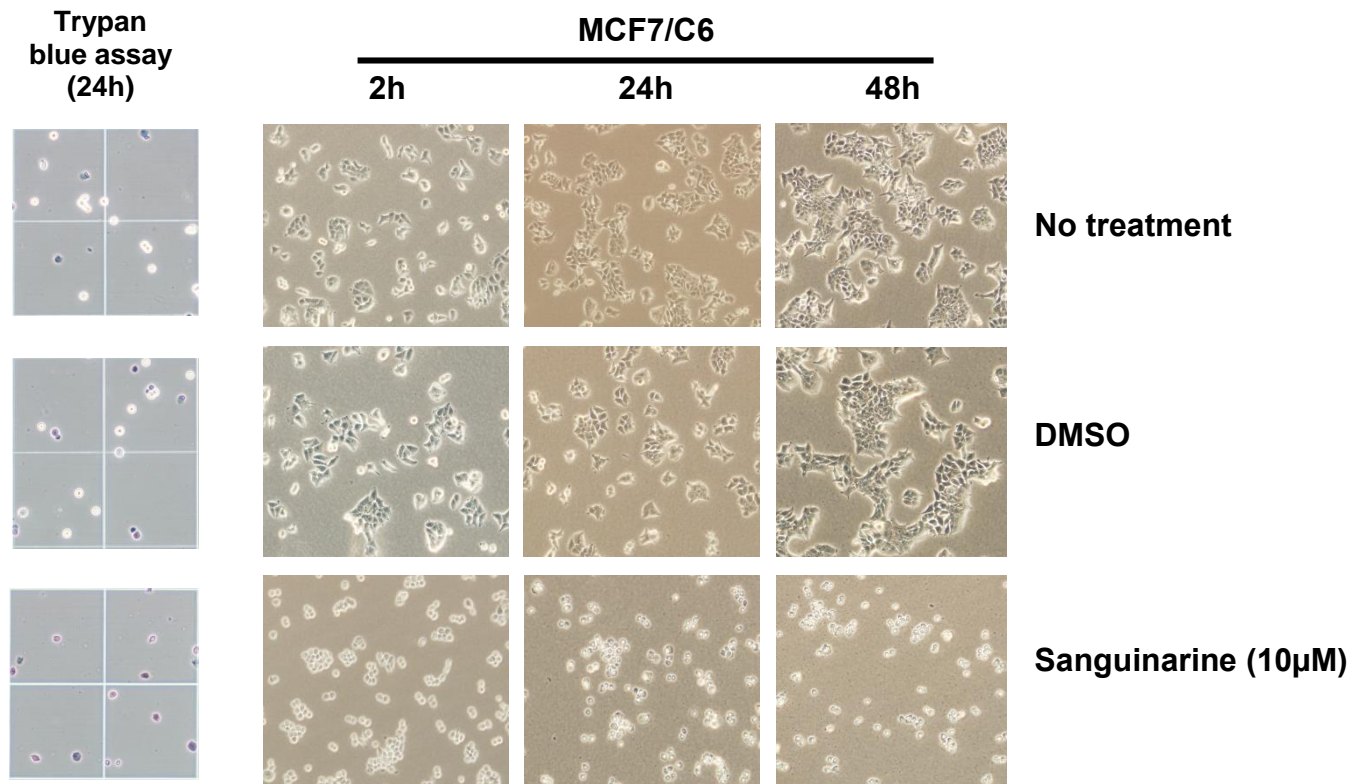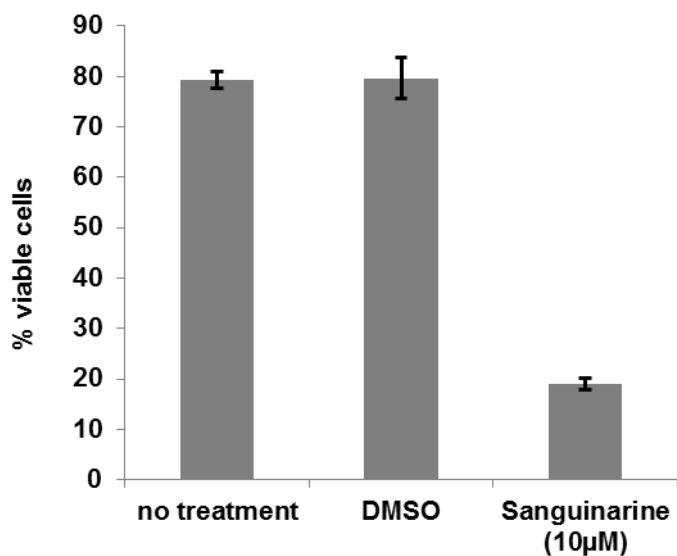

**Supplemental Figure 5. Cell viability following MKP1 inhibitor, Sanguinarine, treatment in MCF7/C6 cells.** Radioresistant MCF7/C6 breast cancer cells were treated with 10 $\mu$ M of Sanguinarine for the indicated time points. Bright field images were obtained to visualize the morphology and viability of cells. DMSO was used as the solvent control. The trypan blue assay was performed to determine the percentage of viable cells at 24h.
