# Supplementary material
Source: PubMed Central journal article supplement (PMC4267894)
Supplement: NIHMS640515-supplement-7.pdf [file NIHMS640515-supplement-7.pdf]

A.

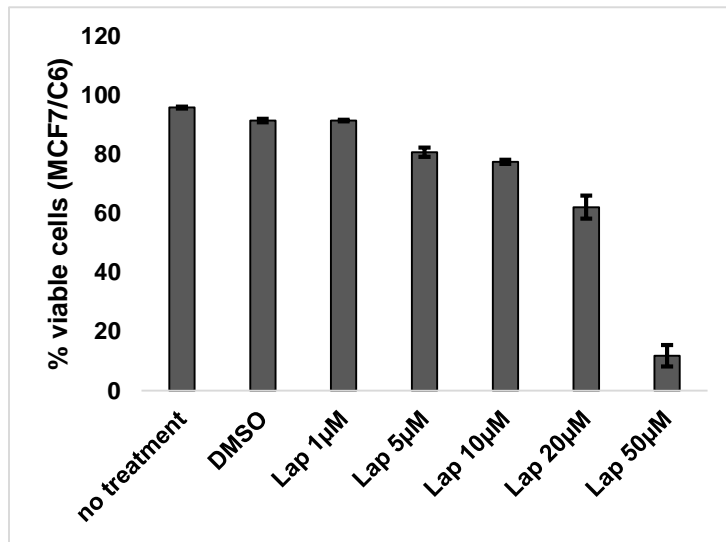

B.

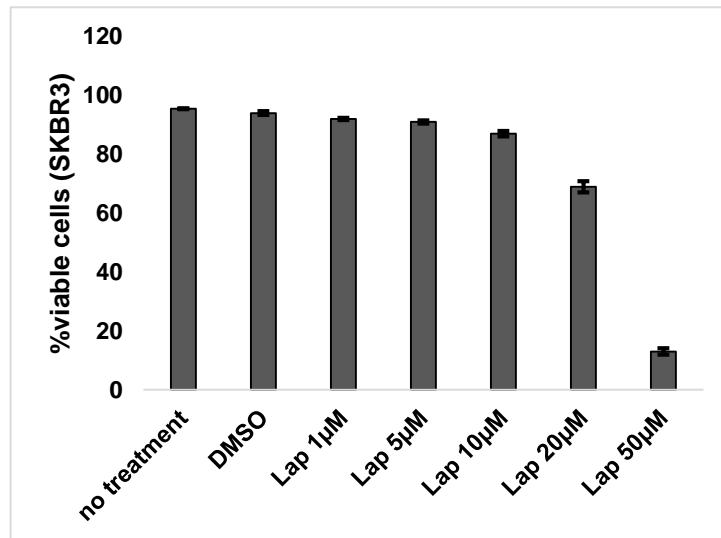

**Supplemental Figure 6. Cell viability following HER2 inhibitor, Lapatinib, treatment in MCF7/C6 and SKBR3 cells.** Radioresistant MCF7/C6 breast cancer cells (a) and HER2 overexpressing SKBR3 cells (b) were treated with indicated concentrations of Lapatinib for the indicated time points. DMSO was used as the solvent control. The trypan blue assay was performed to determine the percentage of viable cells at 48h.
