# Supplementary material
Source: PubMed Central journal article supplement (PMC4267894)
Supplement: NIHMS640515-supplement-8.pdf [file NIHMS640515-supplement-8.pdf]

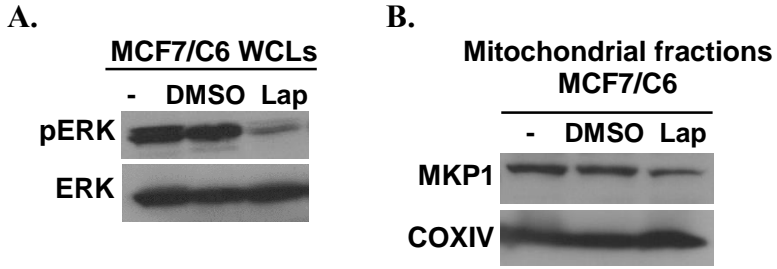

**Supplemental Figure 7. Inhibition of mitochondrial localization of MKP1 upon HER2 inhibitor, Lapatinib, treatment in MCF7/C6 cells.** (a) The phosphorylation of ERK in MCF7/C6 cells treated with DMSO or 20 $\mu$ M of Lapatinib for 48 h. (b) The mitochondrial localization of MKP1 in cells treated with DMSO or 20 $\mu$ M of Lapatinib for 48 h.
